# Supplementary material for: Somatic health in the Indigenous Sami population - a systematic review
Source: PubMed Central journal article supplement — Int J Circumpolar Health. 2019 Jul 1;78(1):1638195. doi: 10.1080/22423982.2019.1638195 (PMC6610513; doi:10.1080/22423982.2019.1638195), 2019-07-01
Supplement: ZICH_A_1638195_SM7179.pdf [file ZICH_A_1638195_SM7179.pdf]

**Supplemental material to “Somatic health in the Indigenous Sami population- a systematic review” Authors: Christina Storm Mienna, Per Axelsson**

**Articles excluded at full-text assessment (n=61)**

1. Aléx, L., et al., *Balancing within various discourses-the art of being old and living as a Sami woman*. Health Care for Women International, 2006. **27**(10): p. 873-892 20p.
2. Alex, L. and A. Lehti, *Experiences of well-being among Sami and Roma women in a Swedish context*. Health Care Women Int, 2013. **34**(8): p. 707-26.
3. Blix, B.H., T. Hamran, and H.K. Normann, *Indigenous Life Stories as Narratives of Health and Resistance: A Dialogical Narrative Analysis*. Canadian Journal of Nursing Research, 2012. **44**(2): p. 64-85 22p.
4. Bogoyavlenskiy, D., *Demography of peoples of the Russian North in the beginning of XXI century*. Alaska Medicine, 2007. **49**(2 Suppl): p. 269-272.
5. Broderstad, A.R., et al., *Low prevalence of hereditary hemochromatosis in multiethnic populations in Northern Norway*. Scand J Gastroenterol, 2011. **46**(3): p. 350-7.
6. Brox, J., E. Bjornstad, and K. Olaussen, *Hemoglobin, iron, nutrition and life-style among adolescents in a coastal and an inland community in northern Norway*. Int J Circumpolar Health, 2003. **62**(2): p. 130-41.
7. Cesarini, D., E. Lindqvist, and B. Wallace, *Is there an adverse effect of sons on maternal longevity?* Proceedings. Biological Sciences / The Royal Society, 2009. **276**(1664): p. 2081-2084.
8. Eriksen, A.M., et al., *Emotional, physical and sexual violence among Sami and non-Sami populations in Norway: The SAMINOR 2 questionnaire study*. Scand J Public Health, 2015. **43**(6): p. 588-96.
9. Finsen, V., H. Dalen, and J. Nesheim, *The prevalence of Dupuytren's disease among 2 different ethnic groups in northern Norway*. The Journal Of Hand Surgery, 2002. **27**(1): p. 115-117.
10. Forsdahl, A., *[A physician from Finnmark who pointed out the significance of heredity in congenital hip dysplasia]*. Tidsskrift For Den Norske Lægeforening: Tidsskrift For Praktisk Medicin, Ny Række, 2000. **120**(22): p. 2672-2673.
11. Forsius, H., A.W. Eriksson, and J. Fellman, *The international biological program/human adaptability studies among the Skolt Sami in Finland (1966-1970)*. Int J Circumpolar Health, 2012. **71**: p. 1-5.
12. Friborg, O., Sørlie, T., & Hansen, K. L. (2017). Resilience to Discrimination Among Indigenous Sami and Non-Sami Populations in Norway: The SAMINOR2 Study. Journal of Cross-Cultural Psychology, 48(7), 1009–1027.
13. Furberg, M., B. Evengård, and M. Nilsson, *Facing the limit of resilience: perceptions of climate change among reindeer herding Sami in Sweden*. Global Health Action, 2011. **4**.
14. Gjernes, T., *Perceptions of risk and uncertainty among Sami women involved in reindeer herding in Northern Norway*. Health, Risk & Society, 2008. **10**(5): p. 505-516.
15. Grønlie, S.A., et al., *Multiple sclerosis in North Norway, and first appearance in an indigenous population*. Journal Of Neurology, 2000. **247**(2): p. 129-133.
16. Haldorsen, T. and T. Tynes, *Cancer in the Sami population of North Norway, 1970-1997*. Eur J Cancer Prev, 2005. **14**(1): p. 63-8.
17. Hansen, K.L., *Ethnic discrimination and health: the relationship between experienced ethnic discrimination and multiple health domains in Norway's rural Sami population*. International Journal Of Circumpolar Health, 2015. **74**: p. 25125-25125.
18. Hansen, K.L., M. Brustad, and K. Johnsen, *Prevalence of self-reported stomach symptoms*

- after consuming milk among indigenous Sami and non-Sami in Northern- and Mid-Norway - the SAMINOR study. *International Journal Of Circumpolar Health*, 2015. **74**: p. 25762-25762.
19. Hanssen, I., *The influence of cultural background in intercultural dementia care: exemplified by Sami patients*. *Scandinavian Journal of Caring Sciences*, 2013. **27**(2): p. 23-7.
  20. Hassler, S. and L. Eklund, *Sense of coherence and self-reported health among Roma people in Sweden--a pilot study*. *Int J Circumpolar Health*, 2012. **71**(0): p. 1-6.
  21. Hassler, S., et al., *Fatal accidents and suicide among reindeer-herding Sami in Sweden*. *Int J Circumpolar Health*, 2004. **63 Suppl 2**: p. 384-8.
  22. Hassler, S., et al., *Cancer risk in the reindeer breeding Saami population of Sweden, 1961-1997*. *European Journal Of Epidemiology*, 2001. **17**(10): p. 969-976.
  23. Johnsen, K., M. Mahonen, and P. Lunde, *Prevalence estimation and follow-up of aortic regurgitation subjects in a Norwegian Sami population*. *Scand Cardiovasc J*, 2009. **43**(3): p. 176-80.
  24. Johnsen, K., R. Goll, and O. Reikeras, *Acetabular dysplasia as an aetiological factor in development of hip osteoarthritis*. *Int Orthop*, 2009. **33**(3): p. 653-7.
  25. Johnsen, K., R. Goll, and O. Reikeras, *Acetabular dysplasia in the Sami population: a population study among Sami in north Norway*. *Int J Circumpolar Health*, 2008. **67**(1): p. 147-53.
  26. Kaiser, N., et al., *Hazardous drinking and drinking patterns among the reindeer-herding Sami population in Sweden*. *Subst Use Misuse*, 2011. **46**(10): p. 1318-27.
  27. Kurttio, P., et al., *Radiation doses from global fallout and cancer incidence among reindeer herders and Sami in Northern Finland*. *Occupational And Environmental Medicine*, 2010. **67**(11): p. 737-743.
  28. Kvernmo, S., *Mental health of Sami youth*. *Int J Circumpolar Health*, 2004. **63**(3): p. 221-34.
  29. Mehli, H., et al., *The impact of Chernobyl fallout on the Southern Saami reindeer herders of Norway in 1996*. *Health Phys*, 2000. **79**(6): p. 682-90.
  30. Mienna, C.S., E.E. Johansson, and A. Wänman, *"Grin(d) and bear it": narratives from Sami women with and without temporomandibular disorders. A qualitative study*. *Journal Of Oral & Facial Pain And Headache*, 2014. **28**(3): p. 243-251.
  31. Mienna, C.S. and A. Wänman, *Self-reported impact on daily life activities related to temporomandibular disorders, headaches, and neck-shoulder pain among women in a Sami population living in Northern Sweden*. *J Orofac Pain*, 2012. **26**(3): p. 215-24.
  32. Minde, G.-T. and T.M. Sæterstrand, *What is important in the surroundings in order to extend the healthy life period? A regional study of 19 older women in a northern part of Norway*. *International Journal Of Circumpolar Health*, 2013. **72**.
  33. Nicolai, S.S. and M. Saus, *Acknowledging the past while looking to the future: conceptualizing indigenous child trauma*. *Child Welfare*, 2013. **92**(4): p. 55-74.
  34. Nilsson, L.M., et al., *A traditional Sami diet score as a determinant of mortality in a general northern Swedish population*. *International Journal Of Circumpolar Health*, 2012. **71**(0): p. 1-12.
  35. Nilsson, L.M., et al., *Diet and lifestyle of the Sami of southern Lapland in the 1930s--1950s and today*. *Int J Circumpolar Health*, 2011. **70**(3): p. 301-18.
  36. Norum, J. and C. Nieder, *Sami-speaking municipalities and a control group's access to somatic specialist health care (SHC): a retrospective study on general practitioners' referrals*. *International Journal Of Circumpolar Health*, 2012. **71**: p. 17346-17346.
  37. Norum, J. and C. Nieder, *Socioeconomic characteristics and health outcomes in Sami speaking municipalities and a control group in northern Norway*. *Int J Circumpolar Health*, 2012. **71**: p. 19127.
  38. Norum, J., et al., *Health consumption in Sami-speaking municipalities with regard to cancer and radiotherapy*. *Int J Circumpolar Health*, 2011. **70**(3): p. 319-28.

39. Nystad, T., et al., *The effect of coffee consumption on serum total cholesterol in the Sami and Norwegian populations*. Public Health Nutr, 2010. **13**(11): p. 1818-25.
40. Nystad, T., et al., *Distribution of apoB/apoA-I ratio and blood lipids in Sami, Kven and Norwegian populations: the SAMINOR study*. Int J Circumpolar Health, 2008. **67**(1): p. 67-81.
41. Omma, L. and M. Sandlund, *Alcohol use in young indigenous Sami in Sweden*. Nordic Journal of Psychiatry, 2015. **69**(8): p. 621-628.
42. Rosati, G., *The prevalence of multiple sclerosis in the world: an update*. Neurological Sciences: Official Journal Of The Italian Neurological Society And Of The Italian Society Of Clinical Neurophysiology, 2001. **22**(2): p. 117-139.
43. Ross, A.B., et al., *Lifestyle, genetics, and disease in Sami*. Croat Med J, 2006. **47**(4): p. 553-65.
44. Selnes, A., et al., *Cumulative incidence of asthma and allergy in north-Norwegian schoolchildren in 1985 and 1995*. Pediatric Allergy And Immunology: Official Publication Of The European Society Of Pediatric Allergy And Immunology, 2002. **13**(1): p. 58-63.
45. Sexton, R. and E.A.B. Stabbursvik, *Healing in the Sámi North*. Culture, Medicine And Psychiatry, 2010. **34**(4): p. 571-589.
46. Skuterud, L. and H. Thørring, *Fallout 137Cs in reindeer herders in Arctic Norway*. Environmental Science & Technology, 2015. **49**(5): p. 3145-3149.
47. Skuterud, L. and H. Thørring, *Averted doses to Norwegian Sámi reindeer herders after the Chernobyl accident*. Health Physics, 2012. **102**(2): p. 208-216.
48. Soininen, L., H. Mussalo-Rauhamaa, and J. Lehto, *Hair chromium concentration of northern Finns*. International Journal Of Circumpolar Health, 2003. **62**(3): p. 276-283.
49. Soininen, L., S. Järvinen, and E. Pukkala, *Cancer incidence among Sami in Northern Finland, 1979-1998*. International Journal Of Cancer. Journal International Du Cancer, 2002. **100**(3): p. 342-346.
50. Spein, A.R., *Substance use among young indigenous Sami--a summary of findings from the North Norwegian Youth Study*. International Journal Of Circumpolar Health, 2008. **67**(1): p. 122-134.
51. Spein, A.R., H. Sexton, and S. Kvernmo, *Substance use in young indigenous Sami: an ethnocultural and longitudinal perspective*. Substance Use & Misuse, 2007. **42**(9): p. 1379-1400.
52. Spein, A.R., H. Sexton, and S.E. Kvernmo, *Longitudinal drinking patterns in indigenous Sami and non-indigenous youth in northern Norway*. Journal of Ethnicity in Substance Abuse, 2006. **5**(3): p. 103-117 15p.
53. Spein, A.R., H. Sexton, and S. Kvernmo, *Predictors of smoking behaviour among indigenous sami adolescents and non-indigenous peers in north Norway*. Scandinavian Journal Of Public Health, 2004. **32**(2): p. 118-129.
54. Spein, A.R., S.E. Kvernmo, and H. Sexton, *The North Norwegian Youth Study: cigarette smoking among ethnically diverse adolescents*. Ethnicity & Health, 2002. **7**(3): p. 163-179.
55. Størmer, J., et al., *Health consumption in Sami speaking municipalities and a control group with regard to medical imaging*. International Journal Of Circumpolar Health, 2012. **71**: p. 17620-17620.
56. Swanson Nicolai, S. and M. Saus, *Acknowledging the Past while Looking to the Future: Conceptualizing Indigenous Child Trauma*. Child Welfare, 2013. **92**(4): p. 55-74 20p.
57. Tervo, H. and M. Nikkonen, *'In the mountains one feels like a dog off the leash' -- Sámi perceptions of welfare and its influencing factors*. Nordic Journal of Nursing Research & Clinical Studies / Vård i Norden, 2010. **30**(4): p. 9-14 6p.
58. Tervo, H., L. Müller-Wille, and M. Nikkonen, *Health culture within the context of the*

- northern environment*. International Journal Of Circumpolar Health, 2003. **62**(2): p. 167-181.
59. Tynes, T. and T. Haldorsen, *Mortality in the Sami population of North Norway, 1970-98*. Scandinavian Journal Of Public Health, 2007. **35**(3): p. 306-312.
60. Winsa, B., *Language policies: instruments in cultural development and well-being*. International Journal Of Circumpolar Health, 2005. **64**(2): p. 170-183.
61. Young TK, Kelly JJ, Friborg J, Soininen L, Wong KO. Cancer among circumpolar populations: an emerging public health concern. Int J Circumpolar Health. 2016 Jan 12;75:29787.
